CORRECTION

# Correction: 3D Topography of the Young Adult Anal Sphincter Complex Reconstructed from Undeformed Serial Anatomical Sections

Yi Wu, Noshir F. Dabhoiwala, Jaco Hagoort, Jin-Lu Shan, Li-Wen Tan, Bin-Ji Fang, Shao-Xiang Zhang, Wouter H. Lamers

There file names for [S3 Fig](#), [S4 Fig](#), [S5 Fig](#), [S6 Fig](#), [S7 Fig](#) and [S8 Fig](#) are incorrectly switched. There is also an error in the caption for [S2 Fig](#). Please see the corrected file names and captions for [S2–S8 Figs](#) below.

**S2 Fig. The Amira software interface.** The segmentation procedure and the color code of the structures identified are shown. The same color code is used to label these structures in Figs 1–4 and [S3 Fig](#).  
(TIF)

**S3 Fig. Interactive 3D rendering of the topographic anatomy of the female pelvic floor.** The reconstruction (see “interactive 3D-pdf topography of ASC.pdf”), which is based on 46 structures identified in the CVH5 specimen, can be moved with the left mouse button and changed in size with the right mouse button. Structures can be activated or removed, or made transparent via the “Model Tree” option (shown on left side of image and activated via a right click in the image). Note that the levator ani muscle has a single anterior head, so that the division between the anterior portion of the pubovisceral and puborectal muscles is arbitrary and introduced only because of the requirements of the reconstruction program.  
(TIF)

**S4 Fig. Serial sections 1–93 of the lesser pelvis of specimen CVH5.** These sections were used to build the reconstruction shown in [S3 Fig](#).  
(TIF)

**S5 Fig. Images of sections shown in Fig 1 without contours.** All Figures were magnified 1.3-fold. The panel labels are retained.  
(PDF)

**S6 Fig. Images of sections shown in Fig 2 without contours.** All Figures were magnified 1.3-fold. The panel labels are retained.  
(PDF)

**S7 Fig. Images of sections shown in Fig 3 without contours.** All Figures were magnified 1.3-fold. The panel labels are retained.  
(TIF)

**S8 Fig. Images of sections shown in Fig 4 without contours.** All Figures were magnified 1.3-fold. The Spanel labels are retained.  
(TIF)

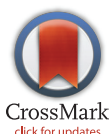

## OPEN ACCESS

**Citation:** Wu Y, Dabhoiwala NF, Hagoort J, Shan J-L, Tan L-W, Fang B-J, et al. (2015) Correction: 3D Topography of the Young Adult Anal Sphincter Complex Reconstructed from Undeformed Serial Anatomical Sections. PLoS ONE 10(10): e0140736. doi:10.1371/journal.pone.0140736

**Published:** October 9, 2015

**Copyright:** © 2015 Wu et al. This is an open access article distributed under the terms of the [Creative Commons Attribution License](#), which permits unrestricted use, distribution, and reproduction in any medium, provided the original author and source are credited.

## Reference

1. Wu Y, Dabhoiwala NF, Hagoort J, Shan J-L, Tan L-W, Fang B-J, et al. (2015) 3D Topography of the Young Adult Anal Sphincter Complex Reconstructed from Undeformed Serial Anatomical Sections. PLoS ONE 10(8): e0132226. doi:[10.1371/journal.pone.0132226](https://doi.org/10.1371/journal.pone.0132226) PMID: [26305117](https://pubmed.ncbi.nlm.nih.gov/26305117/)
